# Supplementary material
Source: publisher site journal article supplement (https://www.dovepress.com/article/247699)

## Figure legends

**Supplementary Figure 1.** A, YAP1 expressions in HBsAg (+) NPC (n=5) compared to HBsAg (-) NPC (n=65) by IHC analysis (  $p=0.557$ ). B and C, 5-year progression-free survival and distant metastasis-free survival in high YAP1 expression compare to low YAP1 expression groups show no statistic significant (36.9% vs.50.6%,  $p=0.118$ , 33.6% vs.50.6%,  $p=0.096$ , respectively. D, YAP1 expression has positive correlation with c-MYC expression (  $r=0.556$ ,  $p<0.001$ ).

**Supplementary Figure 2.** The ONCOMINE database ([www.oncomine.com/nasopharyngeal cancer](http://www.oncomine.com/nasopharyngeal%20cancer)) was used to analyze yap gene expression with clinical TNM staging. A, yap gene expression with clinical T staging; B, yap gene expression with clinical N staging.

Supplementary Fig. 1

**A**

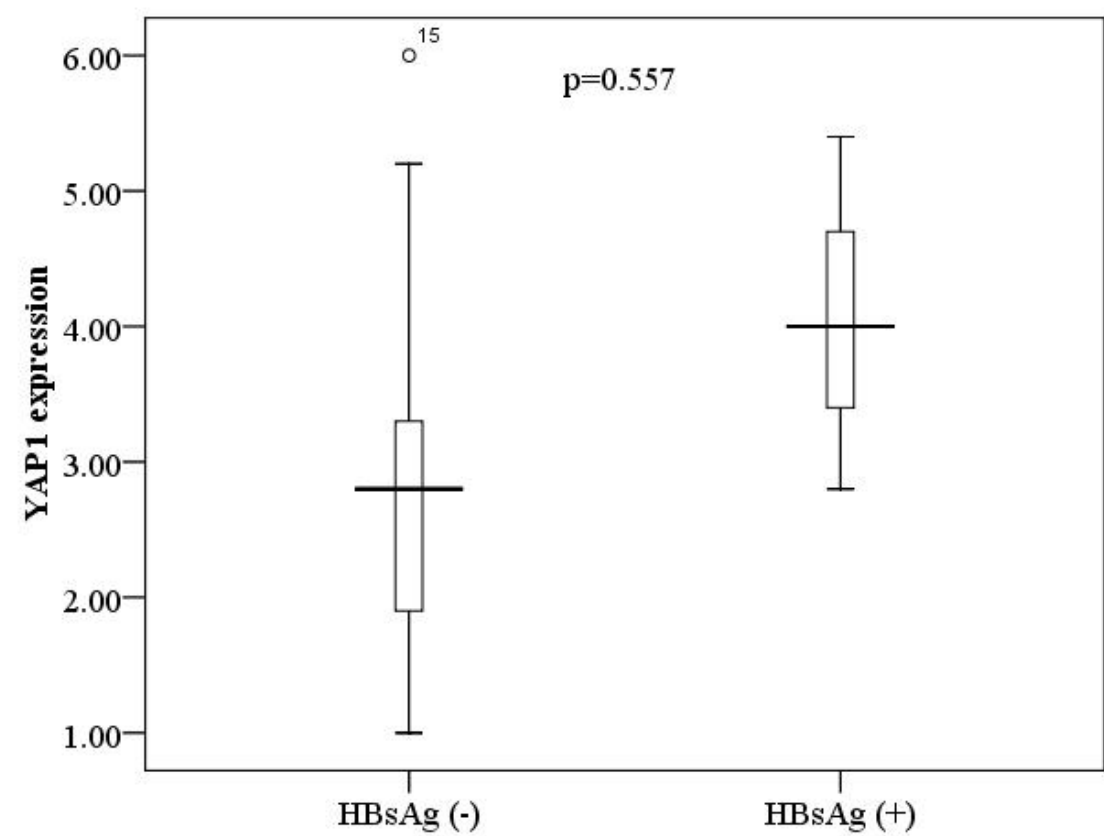

**B**

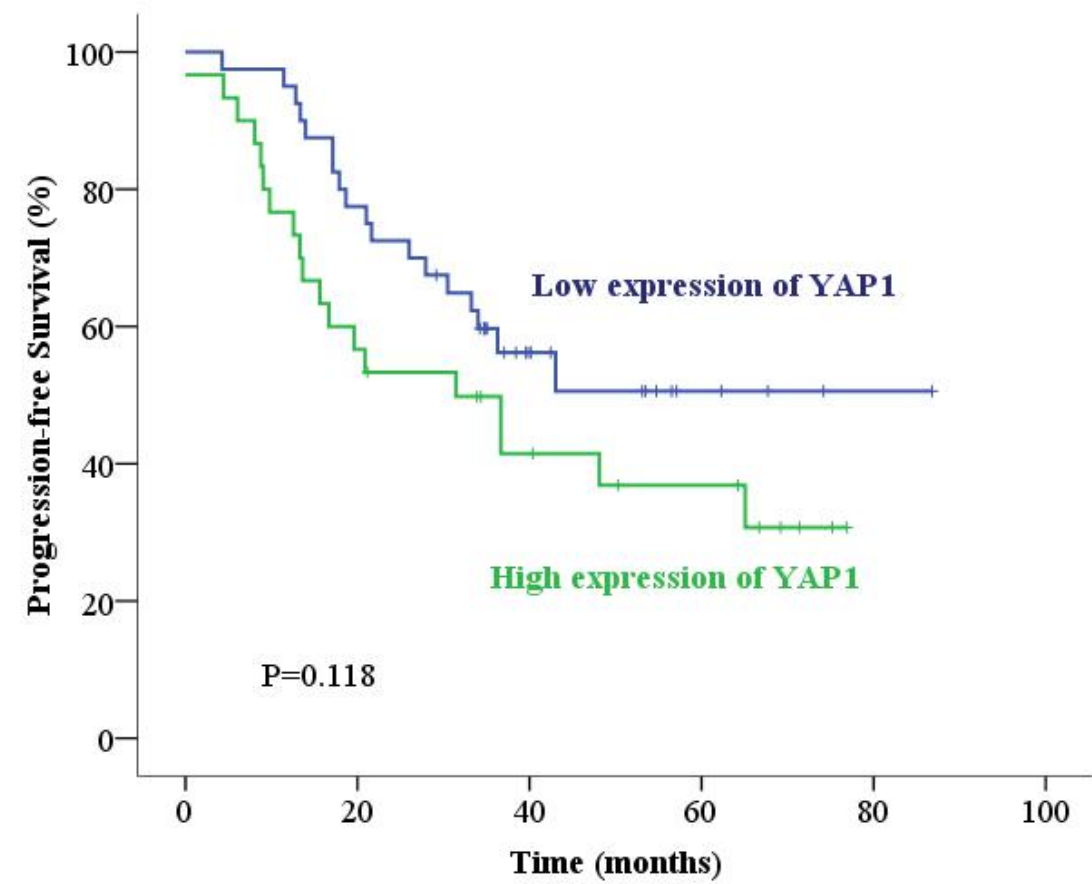

**C**

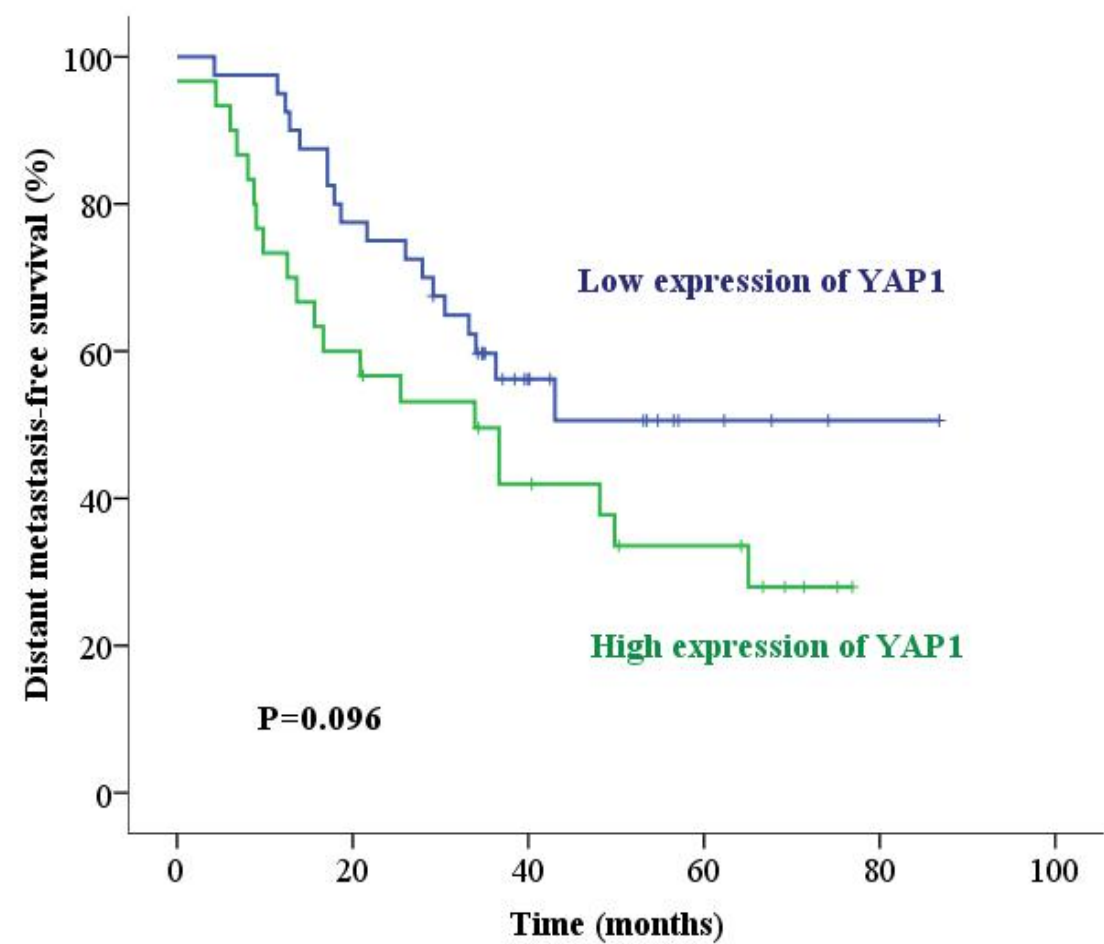

**D**

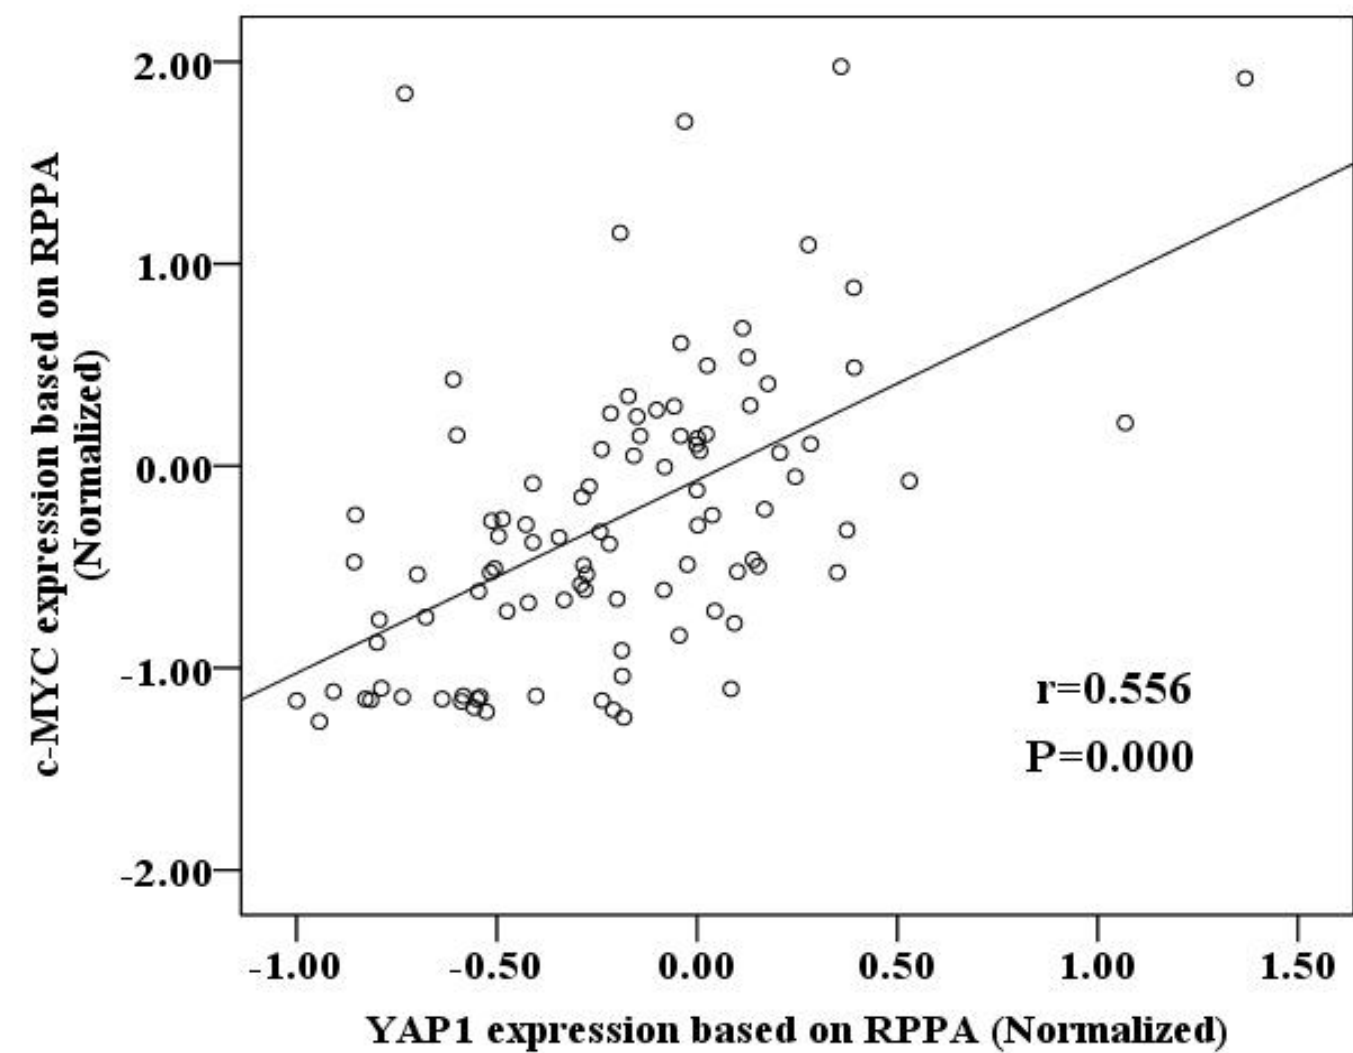

Supplementary Fig. 2

A

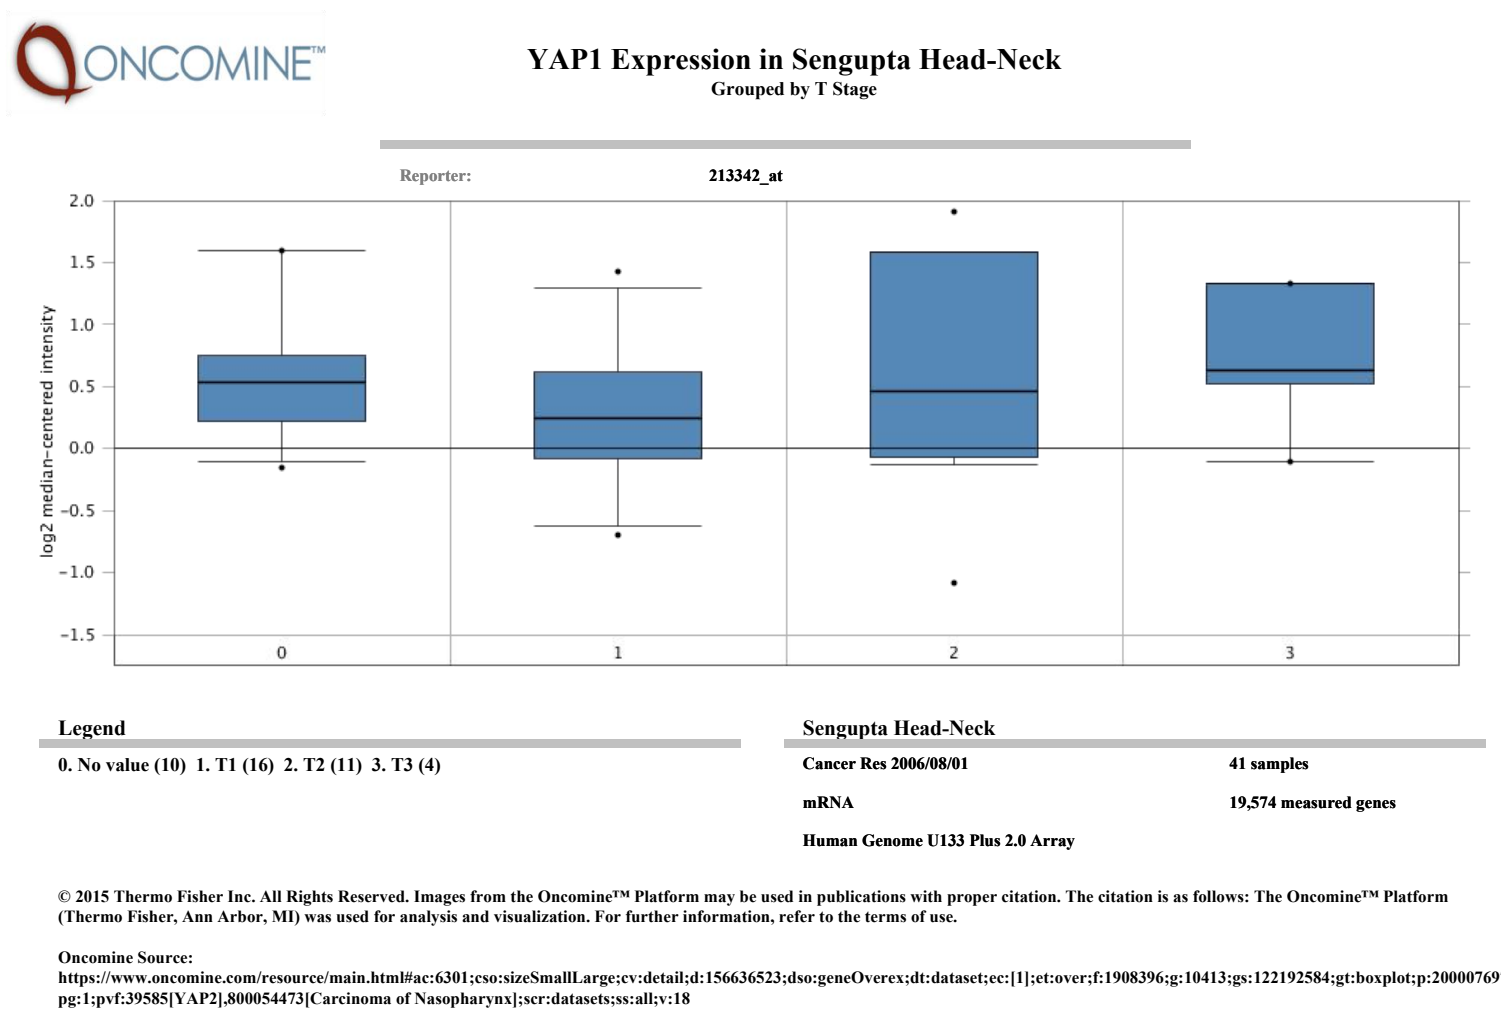

B

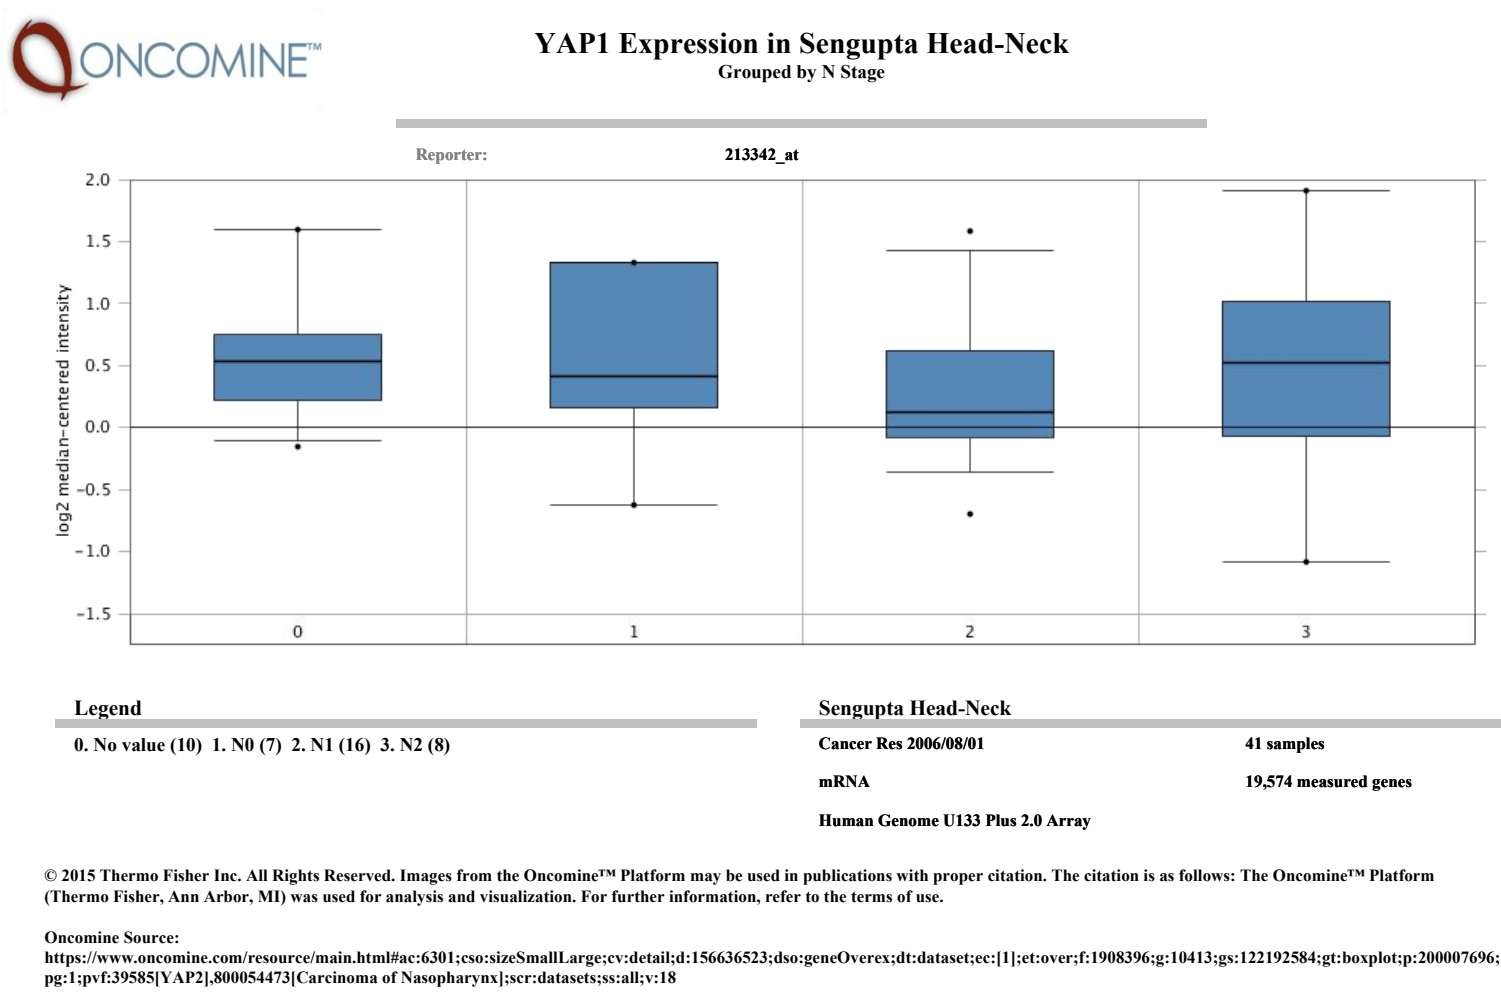

Supplement: Supplementary file 1 [file get_supplementary_file.php]
